# Supplementary material for: Modification of a glassy carbon electrode with a bilayer of multiwalled carbon nanotube/benzene disulfonate-doped polypyrrole: application to sensitive voltammetric determination of olanzapine
Source: Royal Society of Chemistry journal article supplement (doi:10.1039/c4ra04584j), 2014-08-19
Supplement: c4ra04584j1.pdf [file c4ra04584j1.pdf]

### Supplementary Informations

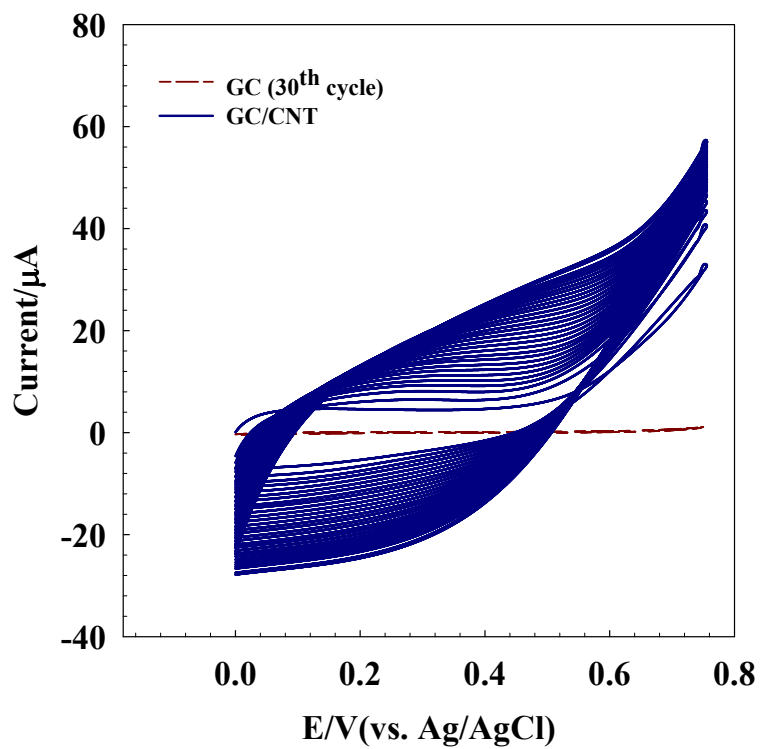

**Fig. S1.** Repetitive cyclic voltammograms for the PPY polymerization reaction on CNT/GCE, and GCE (30<sup>th</sup> scan) in a solution containing 5.00 mM pyrrole + 3.00 mM sodium benzene-1,3-disulfonate with 30 continuous cyclic scanning at 50 mV s<sup>-1</sup>.

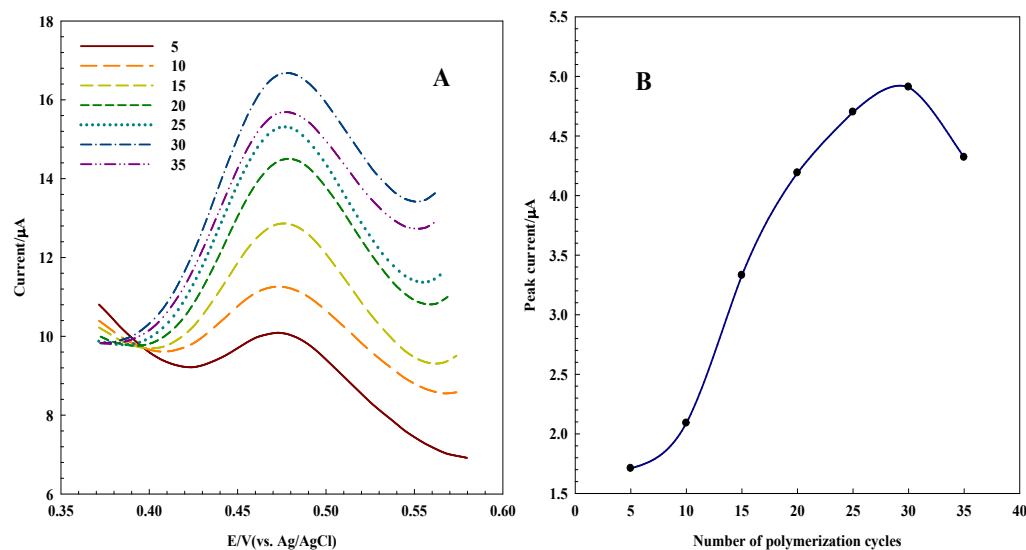

**Fig. S2.** (A) LSVs of 2.00  $\mu\text{M}$  OLZ on the surface of OPPY/CNT/GCE with various number of polymerization cycles; (B) corresponding curve of peak current versus number of polymerization cycles. Supporting electrolyte was phosphate buffer solution (pH 3.0), scan rate was 100  $\text{mV s}^{-1}$ , potential scan rate was 100  $\text{mV s}^{-1}$  and accumulation time was 80 s.
